# Supplementary material
Source: PubMed Central journal article supplement (PMC4018721)
Supplement: NIHMS576275-supplement-1.pdf [file NIHMS576275-supplement-1.pdf]

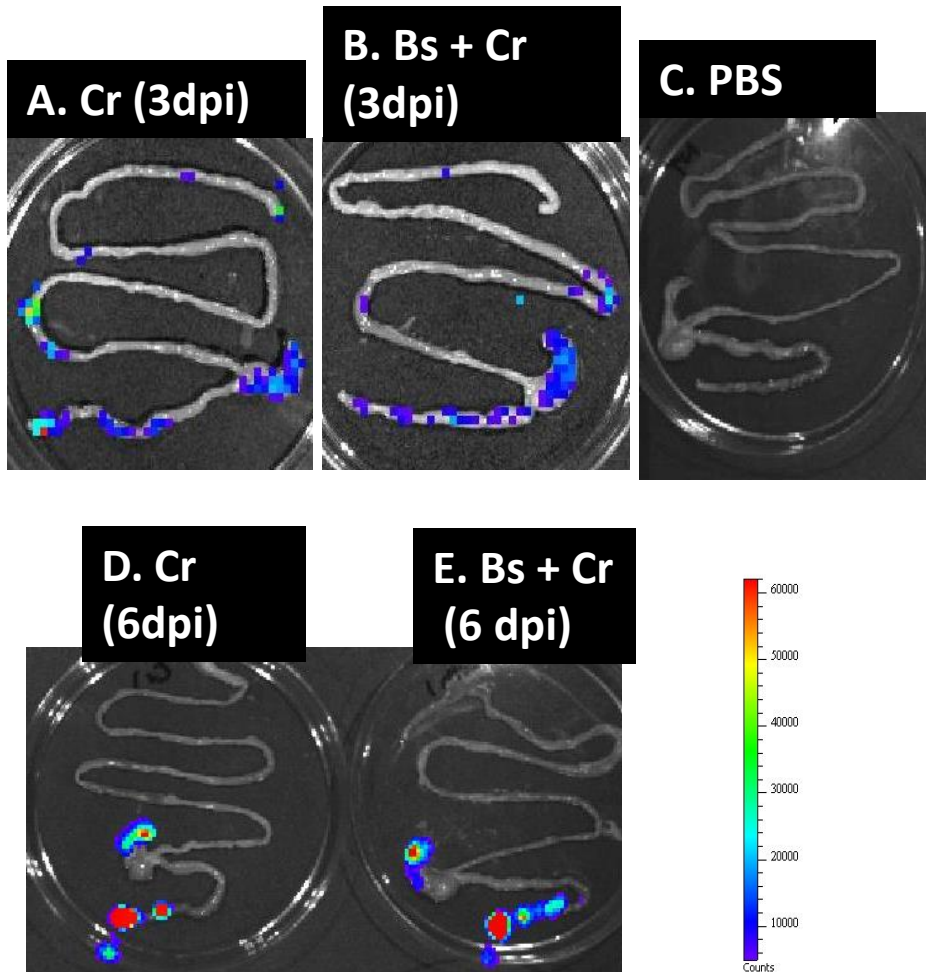

**S1. Effect of *B. subtilis* on *C. rodentium***

**colonization .** Lux+ *C. rodentium* detected by IVIS 3 dpi (A-B) and 6 dpi (D-E) in the presence (B and E) and absence of *B. subtilis* (A and D). No luciferase was detected in uninfected (PBS) control mice (C). These results are representative images from 3 independent experiments with 2-3 mice/experiment.

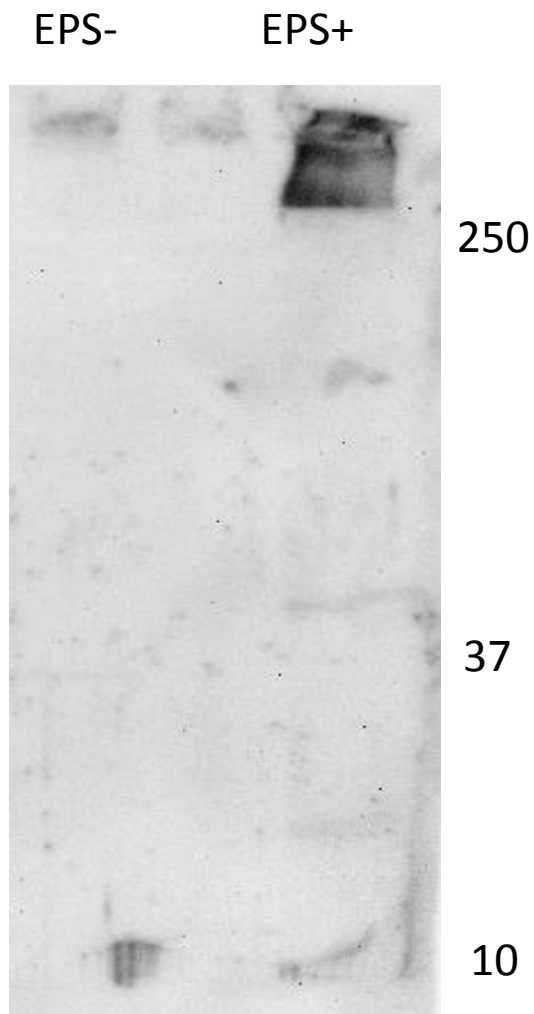

**S2. Analysis of EPS purity.**  
Western blot analysis of EPS  
using rabbit anti-EPS and donkey  
anti-rabbit Ig.
